# Supplementary material for: Food insecurity, vitamin D insufficiency and respiratory infections among Inuit children
Source: PubMed Central journal article supplement (PMC4759828; doi:10.3402/ijch.v75.29954), 2016-02-15
Supplement: IJCH-75-29954-s001.pdf [file IJCH-75-29954-s001.pdf]

**Supplemental Table 1. General characteristics of the children with and without reported severe respiratory infection before age 2 years.**

|                                          | With severe<br>respiratory infection<br>before age 2 years<br>n=112 | Without severe<br>respiratory infection<br>before age 2 years<br>n=233 |
|------------------------------------------|---------------------------------------------------------------------|------------------------------------------------------------------------|
| Age, years, mean(SD)                     | 3.9(0.8)                                                            | 3.9(0.8)                                                               |
| Sex, female, n(%)                        | 53(47.3)                                                            | 127(54.5)                                                              |
| Height, cm, mean(SD)                     | 103.4(7.3)                                                          | 104.2(7.2)                                                             |
| Weight, kg, mean(SD)                     | 20.2(4.0)                                                           | 20.2(4.4)                                                              |
| BMI, median(IQR)                         | 18.2(17.2,19.7)                                                     | 18.1(17.0,19.3)                                                        |
| Birthweight, kg, mean(SD)                | 2.8(1.4)                                                            | 2.5(1.5)                                                               |
| Serum vitamin D level, median(IQR)       | 42.6(27.0,67.3)                                                     | 48.1(33.6,71.9)                                                        |
| Ever breastfed, n(%)                     | 72(64.3)                                                            | 157(67.4)                                                              |
| Household crowding index, median(IQR)    | 2.0(1.7,2.7)                                                        | 2.0(1.5,2.4)                                                           |
| Smokers in the house, n(%)               | 97(86.6)                                                            | 210(90.1)                                                              |
| In utero smoke exposure, n(%)            | 92(81.3)                                                            | 190(81.5)                                                              |
| Type of housing, n(%)                    |                                                                     |                                                                        |
| Public                                   | 77(68.8)                                                            | 157(67.4)                                                              |
| Non-public                               | 33(29.5)                                                            | 66(28.3)                                                               |
| Reported mold or in need of repair, n(%) |                                                                     |                                                                        |
| Mold                                     | 3(2.7)                                                              | 12(5.2)                                                                |
| In need of repairs                       | 23(20.5)                                                            | 50(21.5)                                                               |
| Both                                     | 17(15.2)                                                            | 22(9.4)                                                                |
| Neither                                  | 65(58.0)                                                            | 134(57.5)                                                              |
| Child's location during the day, n(%)    |                                                                     |                                                                        |
| Home                                     | 70(62.5)                                                            | 135(57.9)                                                              |
| Daycare                                  | 37(33.0)                                                            | 86(36.9)                                                               |
| Homecare                                 | 5(4.5)                                                              | 12(5.2)                                                                |

BMI= Body mass index

**Supplemental Table 2. General characteristics of the children with and without health center visit for respiratory problem in the past 12 months.**

|                                          | With health center<br>visit for a respiratory<br>problem in the past<br>12 months<br>n=160 | Without health center<br>visit for a respiratory<br>problem in the past<br>12 months<br>n=218 |
|------------------------------------------|--------------------------------------------------------------------------------------------|-----------------------------------------------------------------------------------------------|
| Age, years, mean(SD)                     | 3.8(0.8)                                                                                   | 3.9(0.8)                                                                                      |
| Sex, female, n(%)                        | 80(50.0)                                                                                   | 120(55.0)                                                                                     |
| Height, cm, mean(SD)                     | 102.9(7.0)                                                                                 | 104.7(7.3)                                                                                    |
| Weight, kg, mean(SD)                     | 19.9(4.1)                                                                                  | 20.4(4.2)                                                                                     |
| BMI, median(IQR)                         | 18.3(17.0,19.7)                                                                            | 18.0(17.1,19.2)                                                                               |
| Birthweight, kg, mean(SD)                | 2.6(1.5)                                                                                   | 2.6(1.5)                                                                                      |
| Serum vitamin D level, median(IQR)       | 55.4(33.4,75.7)                                                                            | 45.4(33.0,63.6)                                                                               |
| Ever breastfed, n(%)                     | 95(59.4)                                                                                   | 153(70.2)                                                                                     |
| Household crowding index, median(IQR)    | 2.0(1.5,2.5)                                                                               | 2.0(1.5,2.5)                                                                                  |
| Smokers in the house, n(%)               | 143(89.4)                                                                                  | 196(89.9)                                                                                     |
| In utero smoke exposure, n(%)            | 132(82.5)                                                                                  | 178(81.7)                                                                                     |
| Type of housing, n(%)                    |                                                                                            |                                                                                               |
| Public                                   | 113(70.6)                                                                                  | 147(67.4)                                                                                     |
| Non-public                               | 42(26.3)                                                                                   | 64(29.4)                                                                                      |
| Reported mold or in need of repair, n(%) |                                                                                            |                                                                                               |
| Mold                                     | 9(5.6)                                                                                     | 11(5.0)                                                                                       |
| In need of repairs                       | 39(24.4)                                                                                   | 48(22.0)                                                                                      |
| Both                                     | 22(13.8)                                                                                   | 20(9.2)                                                                                       |
| Neither                                  | 82(51.3)                                                                                   | 128(58.7)                                                                                     |
| Child's location during the day, n(%)    |                                                                                            |                                                                                               |
| Home                                     | 94(58.8)                                                                                   | 140(64.2)                                                                                     |
| Daycare                                  | 57(35.6)                                                                                   | 70(32.1)                                                                                      |
| Homecare                                 | 9(5.6)                                                                                     | 8(3.7)                                                                                        |

BMI= Body mass index

**Supplemental Table 3. General characteristics of the children in whom serum vitamin D levels were available, stratified by vitamin D levels. (cutoffs based on the Canadian Pediatric Society recommendations)**

|                                          | Vitamin D sufficient<br>( $\geq 75$ nmol/L) n=58 | Vitamin D insufficient<br>(25-75nmol/L) n=186 | Vitamin D deficient<br>(<25 nmol/L) n=35 |
|------------------------------------------|--------------------------------------------------|-----------------------------------------------|------------------------------------------|
| Age, years, mean(SD)                     | 3.7 (0.8)                                        | 4.0 (0.8)                                     | 4.0 (0.8)                                |
| Sex, female, n(%)                        | 35 (60.3)                                        | 91 (48.9)                                     | 22 (62.9)                                |
| Height, cm, mean(SD)                     | 102.0 (7.9)                                      | 104.4 (7.2)                                   | 104.4 (7.2)                              |
| Weight, kg, mean(SD)                     | 19.4 (4.2)                                       | 20.1 (3.6)                                    | 20.5 (4.5)                               |
| BMI, median(IQR)                         | 18.0 (16.8,19.0)                                 | 18.1 (17.2,19.4)                              | 18.2 (16.6,19.3)                         |
| Birthweight, kg, mean(SD)                | 2.4 (1.4)                                        | 2.5 (1.5)                                     | 3.3 (1.5)                                |
| Serum vitamin D level, median(IQR)       | 96.6 (84.1,108.3)                                | 45.8 (34.7,58.5)                              | 19.3 (18.0,23.1)                         |
| Ever breastfed, n(%)                     | 34 (58.6)                                        | 122 (65.6)                                    | 26 (74.3)                                |
| Household crowding index, median(IQR)    | 2.0 (1.5,2.5)                                    | 2.0 (1.6,2.5)                                 | 2.2 (1.9,2.5)                            |
| Smokers in the house, n(%)               | 53 (94.6)                                        | 162 (87.1)                                    | 32 (91.4)                                |
| In utero smoke exposure, n(%)            | 55 (94.8)                                        | 151 (81.2)                                    | 26 (74.3)                                |
| Type of housing, n(%)                    |                                                  |                                               |                                          |
| Public                                   | 43 (74.1)                                        | 124 (66.7)                                    | 24 (68.6)                                |
| Non-public                               | 15 (25.6)                                        | 52 (28.0)                                     | 9 (25.7)                                 |
| Reported mold or in need of repair, n(%) |                                                  |                                               |                                          |
| Mold                                     | 2 (3.4)                                          | 11 (5.9)                                      | 1 (2.9)                                  |
| In need of repairs                       | 13 (22.4)                                        | 42 (22.6)                                     | 6 (17.1)                                 |
| Both                                     | 6 (10.3)                                         | 21 (11.3)                                     | 4 (11.4)                                 |
| Neither                                  | 35 (60.3)                                        | 98 (52.7)                                     | 22 (62.9)                                |
| Child's location during the day, n(%)    |                                                  |                                               |                                          |
| Home                                     | 34 (58.6)                                        | 115 (61.8)                                    | 20 (57.1)                                |
| Daycare                                  | 20 (34.5)                                        | 65 (34.9)                                     | 13 (37.1)                                |
| Homecare                                 | 4 (6.9)                                          | 5 (2.7)                                       | 1 (2.9)                                  |

BMI= Body mass index

**Supplemental Table 4. General characteristics of children with and without serum vitamin D levels available.**

|                                          | Vitamin D available<br>(n=279) | Vitamin D not available<br>(n=109) |
|------------------------------------------|--------------------------------|------------------------------------|
| Age, years, mean(SD)                     | 3.9 (0.8)                      | 3.8 (0.8)                          |
| Sex, female, n(%)                        | 148 (53.0)                     | 56 (51.3)                          |
| Height, cm, mean(SD)                     | 104.0 (7.4)                    | 103.5 (6.6)                        |
| Weight, kg, mean(SD)                     | 20.0 (3.9)                     | 20.4 (4.7)                         |
| BMI, median(IQR)                         | 18.1 (17.0, 19.3)              | 18.4 (17.1, 19.6)                  |
| Birthweight, kg, mean(SD)                | 2.5 (1.5)                      | 2.6 (1.5)                          |
| Ever breastfed, n(%)                     | 182 (65.2)                     | 70 (64.2)                          |
| Household crowding index, median(IQR)    | 2.0 (1.5,2.5)                  | 2.0 (1.5,2.5)                      |
| Smokers in the house, n(%)               | 247 (88.5)                     | 100 (91.7)                         |
| In utero smoke exposure, n(%)            | 232 (83.1)                     | 84 (77.0)                          |
| Type of housing, n(%)                    |                                |                                    |
| Public                                   | 191 (68.5)                     | 76 (69.7)                          |
| Non-public                               | 76 (28.3)                      | 31 (28.4)                          |
| Reported mold or in need of repair, n(%) |                                |                                    |
| Mold                                     | 14 (5.0)                       | 6 (5.5)                            |
| In need of repairs                       | 61 (21.9)                      | 26 (23.9)                          |
| Both                                     | 31 (11.1)                      | 12 (11.0)                          |
| Neither                                  | 155 (55.6)                     | 62 (56.9)                          |
| Child's location during the day, n(%)    |                                |                                    |
| Home                                     | 169 (60.6)                     | 69 (63.3)                          |
| Daycare                                  | 98 (35.1)                      | 31 (28.4)                          |
| Homecare                                 | 10 (3.6)                       | 7 (6.4)                            |

BMI= Body mass index
